# Supplementary material
Source: PubMed Central journal article supplement (PMC2885194)

**Supplemental Figure 3.** Quantitative PCR analysis of SCp2 mouse mammary epithelial cells infected with knockdown constructs targeting p120ctn. NT, nontarget control.

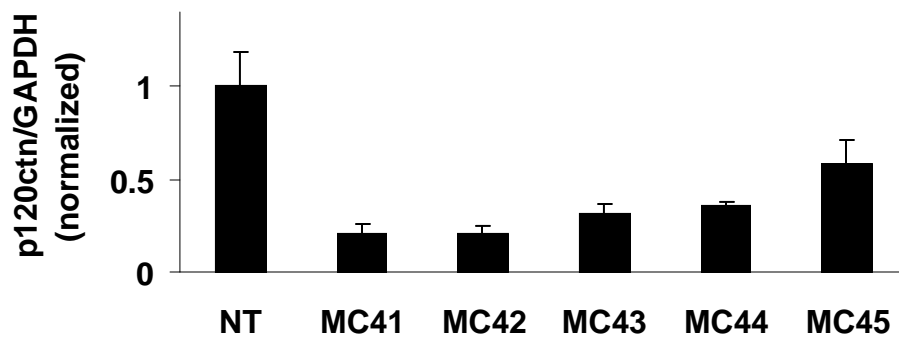

Supplement: supp_M109.099382_jbc.M109.099382-4.pdf [file supp_M109.099382_jbc.M109.099382-4.pdf]
